# Supplementary material
Source: PubMed Central journal article supplement (PMC2972996)
Supplement: 1008475107_pnas.201008475SI.pdf [file 1008475107_pnas.201008475SI.pdf]

# Supporting Information

Meehan et al. 10.1073/pnas.1008475107

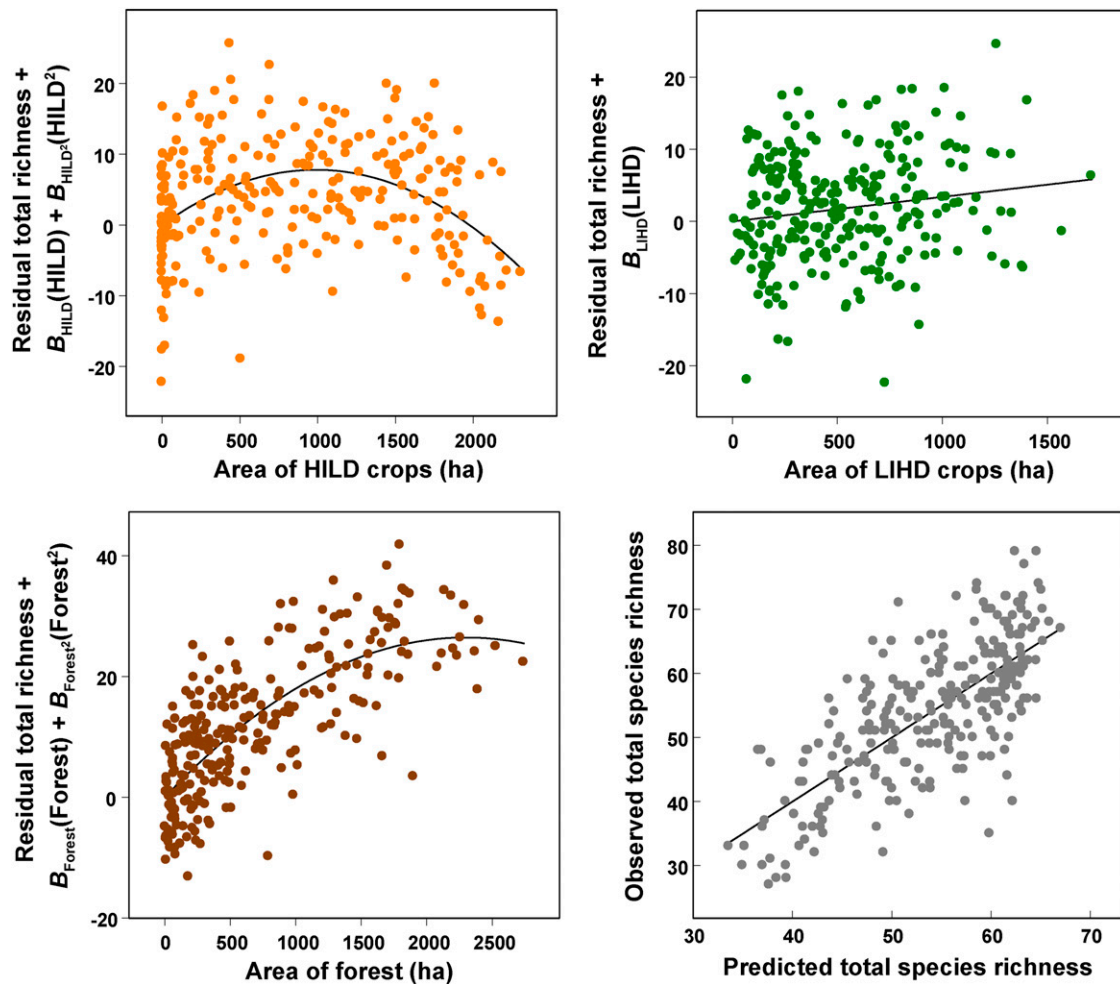

Fig. S1. Partial residual plots for the effects of HILD, LIHD, and forest habitat on total bird species richness. Regression lines illustrate parameter values in Table 1. (Lower Right) Whole-model fit, where the line represents unity.

Change in SCC richness (%) under HILD scenario

Change in SCC richness (%) under LIHD scenario

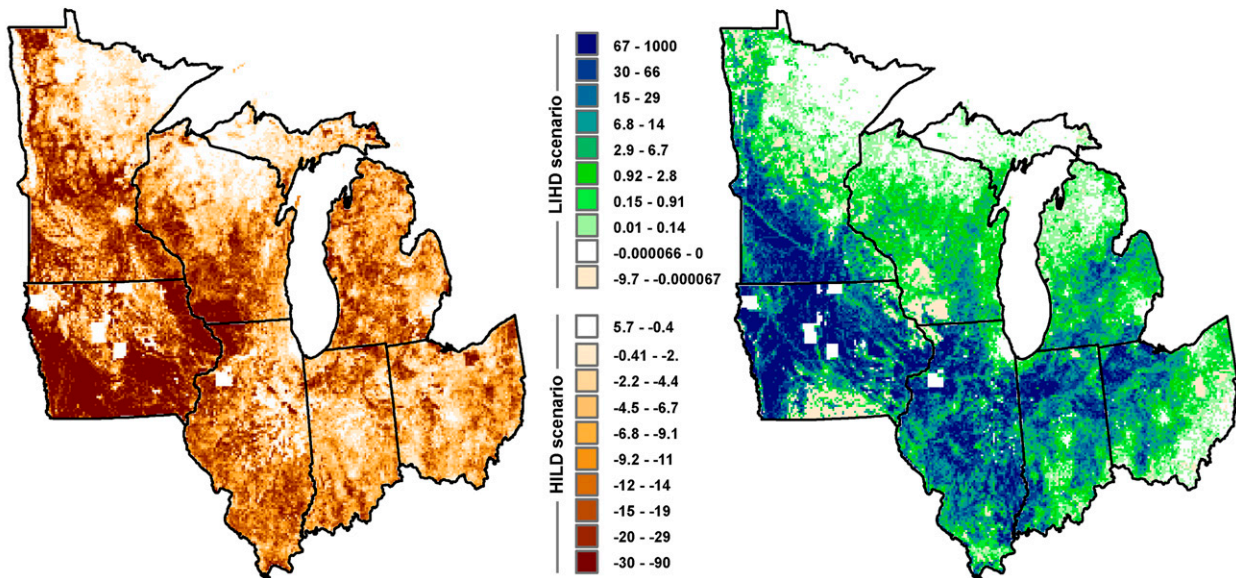

**Fig. S2.** Percent changes in the number of species of conservation concern predicted for 25-km<sup>2</sup> landscape blocks by an empirical land cover model (Table 1 and Fig. 1) under divergent bioenergy scenarios. In the HILD scenario (*Left*), 9.5 million ha of marginal land that currently contain LIHD habitats were converted to HILD bioenergy crops. In the LIHD scenario (*Right*), 8.3 million ha of marginal land that currently contain HILD crops were converted to LIHD habitats. Each color shade corresponds with 10% of the distribution of percent change values.

**Table S1. Competing models, ranked by  $\Delta AIC_c$ , for total bird-species richness as a function of land cover**

| Model                                                               | $\Delta AIC_c$ | Akaike model weight |
|---------------------------------------------------------------------|----------------|---------------------|
| 1. H + H <sup>2</sup> + F + F <sup>2</sup> + L                      | 0.00           | 0.06                |
| 2. H + H <sup>2</sup> + F + F <sup>2</sup> + L + W                  | 0.48           | 0.05                |
| 3. H + H <sup>2</sup> + F + F <sup>2</sup>                          | 0.79           | 0.04                |
| 4. H + H <sup>2</sup> + F + F <sup>2</sup> + L + W + W <sup>2</sup> | 0.87           | 0.04                |
| 5. H + H <sup>2</sup> + F + F <sup>2</sup> + U + U <sup>2</sup>     | 0.96           | 0.04                |
| 6. H + H <sup>2</sup> + F + F <sup>2</sup> + L + U + U <sup>2</sup> | 1.10           | 0.03                |
| 7. H + H <sup>2</sup> + F + F <sup>2</sup> + L + U                  | 1.85           | 0.02                |
| 8. H + H <sup>2</sup> + F + F <sup>2</sup> + L + L <sup>2</sup>     | 1.95           | 0.02                |

H, high-input low-diversity bioenergy crops such as corn and soybeans; L, low-input high-diversity habitats such as pastures, hay fields, and grasslands; F, forest; W, herbaceous wetlands; and U, urban areas with  $\geq 50\%$  impervious surface.
